# Supplementary material for: Combination of solid state NMR and DFT calculation to elucidate the state of sodium in hard carbon electrodes
Source: Royal Society of Chemistry journal article supplement (doi:10.1039/c6ta04273b), 2016-01-01
Supplement: c6ta04273b1.pdf [file c6ta04273b1.pdf]

## Supplementary information

### Combination of solid state NMR and DFT calculation to elucidate the state of sodium in hard carbon electrodes

Ryohei Morita,<sup>a</sup> Kazuma Gotoh,<sup>\*ab</sup> Mika Fukunishi,<sup>bc</sup> Kei Kubota,<sup>bc</sup> Shinichi Komaba,<sup>bc</sup>  
Naoto Nishimura,<sup>d</sup> Takashi Yumura,<sup>d</sup> Kenzo Deguchi,<sup>e</sup> Shinobu Ohki,<sup>e</sup> Tadashi Shimizu<sup>e</sup>  
and Hiroyuki Ishida<sup>a</sup>

- a. Graduate School of Natural Science & Technology, Okayama University, 3-1-1 Tsushima-naka, Okayama 700-8530, Japan
- b. Elements Strategy Initiative for Catalysts and Batteries (ESICB), Kyoto University, Nishikyo-ku, Kyoto 615-8245, Japan
- c. Department of Applied Chemistry, Tokyo University of Science, 1-3 Kagurazaka, Shinjuku, Tokyo 162-8601, Japan
- d. Department of Chemistry and Materials Technology, Kyoto Institute of Technology, Matsugasaki, Sakyo-ku, Kyoto 606-8585, Japan
- e. National Institute for Materials Science, Tsukuba, Ibaraki 305-0003, Japan

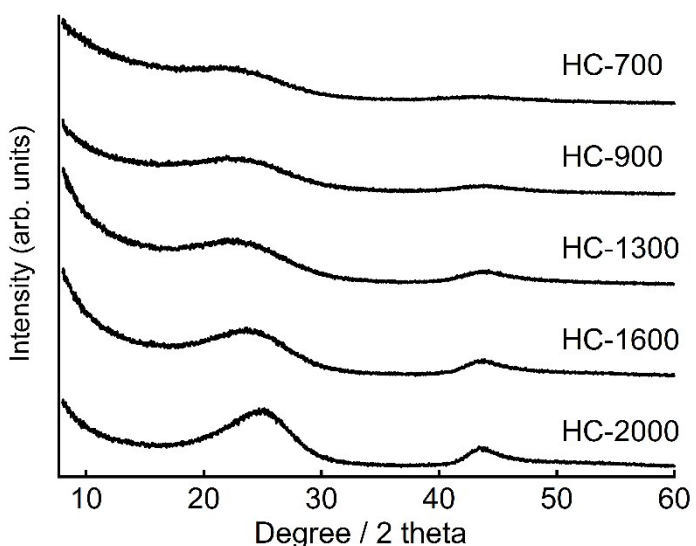

Fig S1. Powder XRD patterns of HC-700, HC-900, HC-1300, HC-1600, and HC-2000.

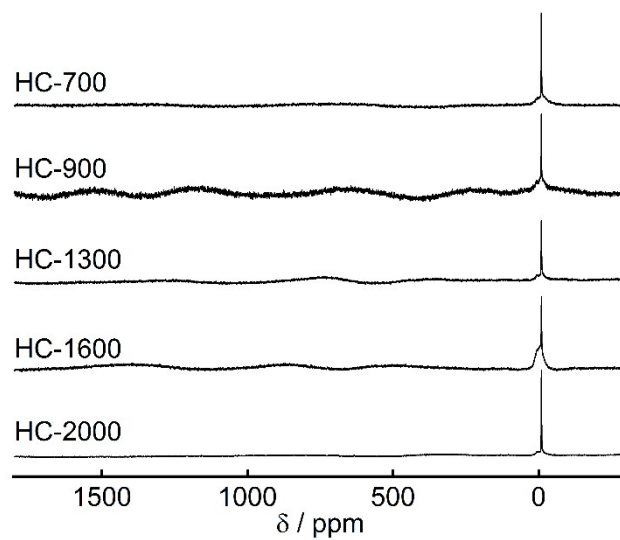

Fig. S2  $^{23}\text{Na}$  MAS NMR spectra (from 1800 to -300 ppm) of sodiated HC-700, HC-900, HC-1300, HC-1600 and HC-2000 samples. No quasi-metallic sodium peak was observed in each spectrum.

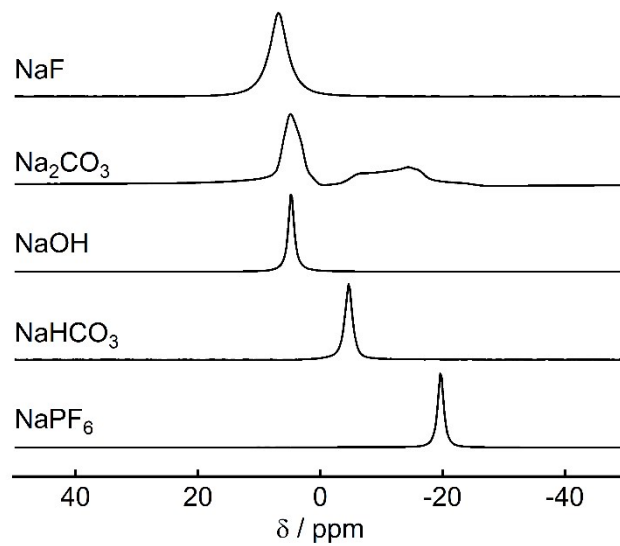

Fig. S3  $^{23}\text{Na}$  MAS NMR spectra of some inorganic sodium compounds.

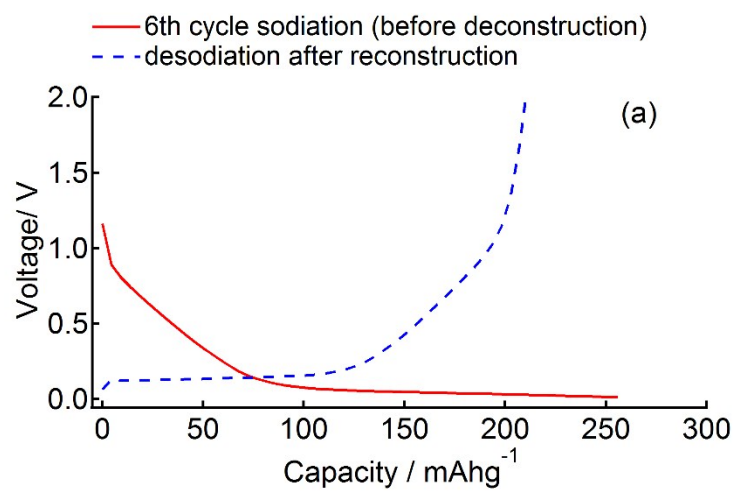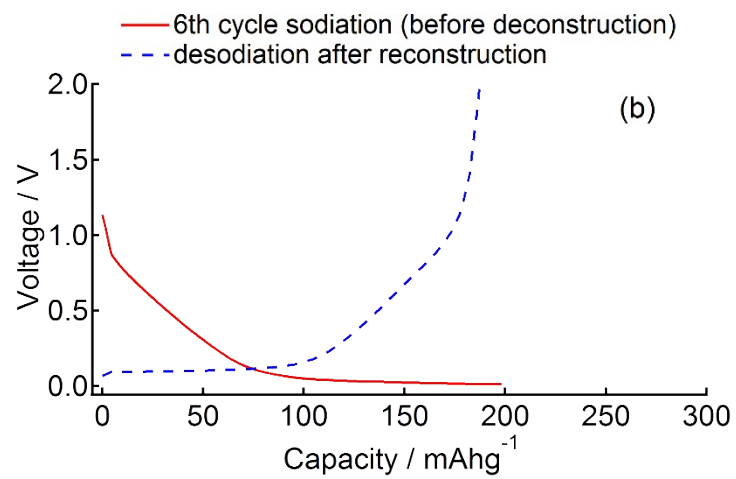

Fig. S4 Charge/discharge curves of two reassembled HC-1300 cells.

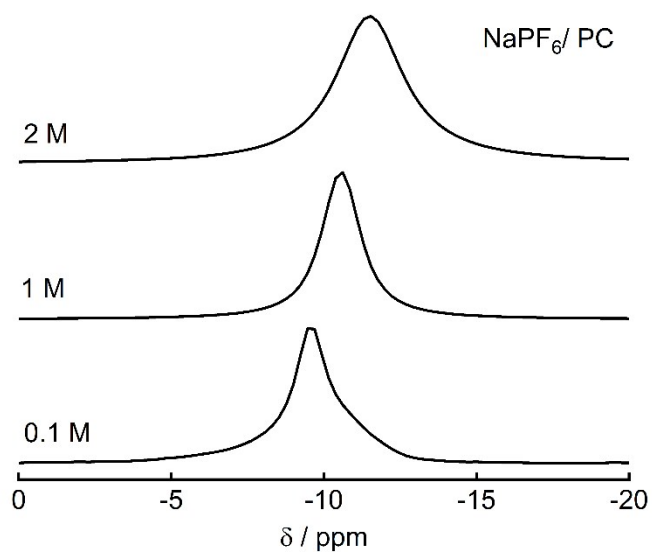

Fig. S5 <sup>23</sup>Na NMR spectra of NaPF<sub>6</sub> / PC solution taken by a solid NMR probe. Each solution was prepared using NaPF<sub>6</sub> powder (Stella Chemifa) and PC (Kishida Chemical).

Single alkali atom on C<sub>150</sub>H<sub>30</sub>

(i) initial configuration

(ii) optimized geometry (Li case)

(iii) optimized geometry (Na case)

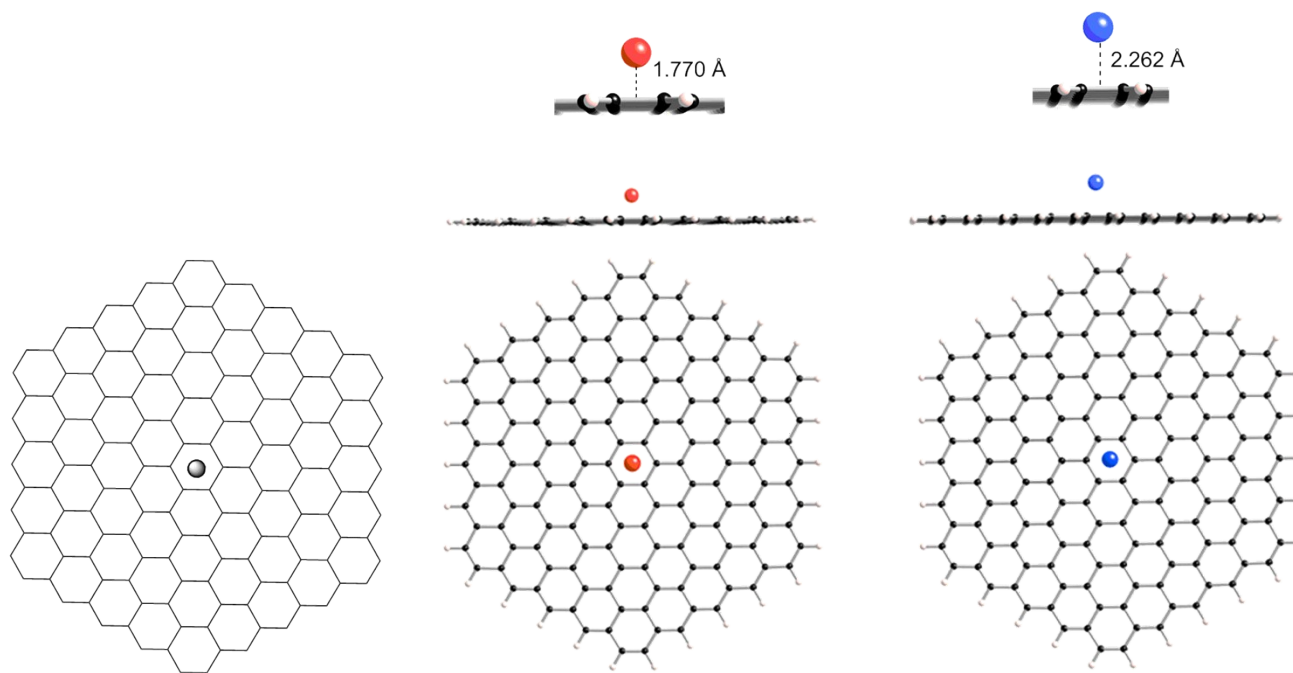

Fig. S6 DFT optimizations of an alkali atom (Li or Na) set at the centre of C<sub>150</sub>H<sub>30</sub>. The single Li (Na) atom is placed separating from the centre by 1.77 (2.26) Å

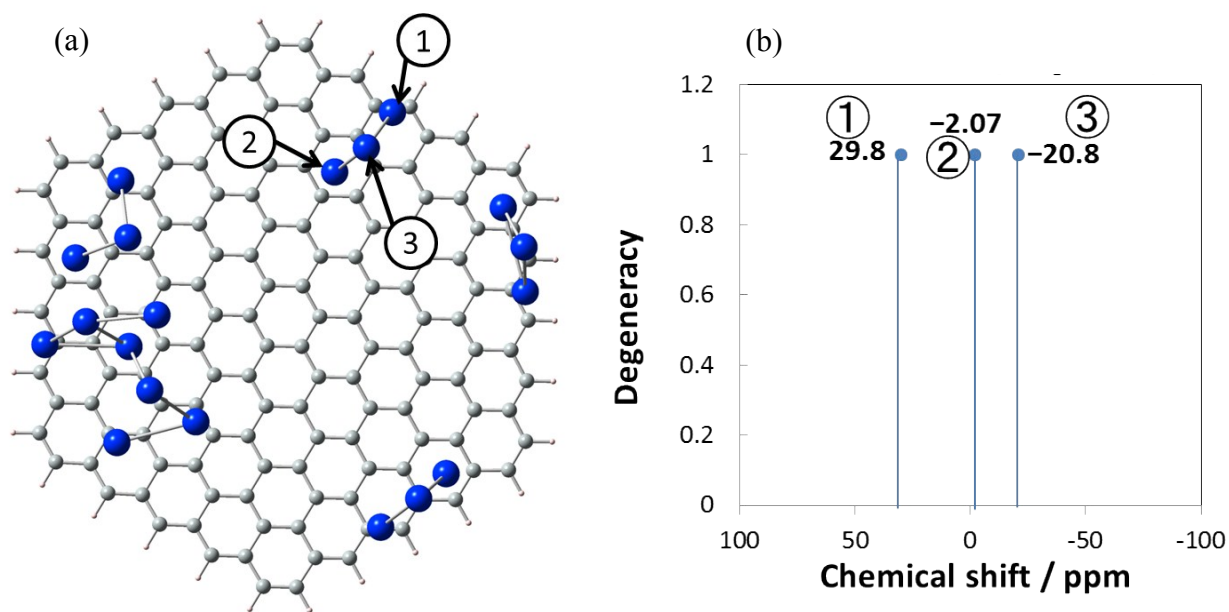

Fig. S7 Chemical shift estimation of one of the Na<sub>3</sub> triangle clusters on a carbon plane using B3LYP/6-31G\*\* function; (a) calculated Na<sub>3</sub> triangle, (b) the estimated chemical shifts values of ①, ②, and ③ atoms. To perform the NMR calculations based on gauge-independent atomic orbital (GIAO) method, we constructed a structure for a Na<sub>3</sub> cluster on C<sub>150</sub>H<sub>30</sub> by removing 16 Na atoms (without labels in (a)) from the optimized structure for 19-Na atoms on C<sub>150</sub>H<sub>30</sub> ((iii) in Fig. 11).
